# Supplementary material
Source: MDPI journal article supplement (https://www.mdpi.com/2311-7524/7/10/401)
Supplement: s1 [file s1]

Supplementary Information

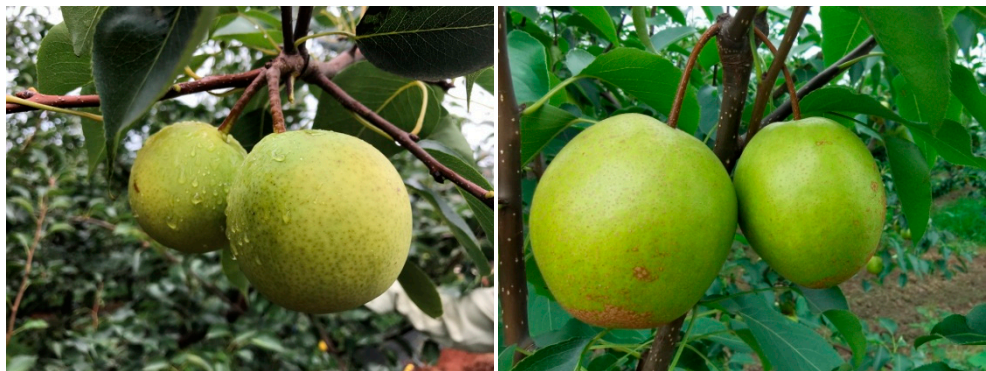

Figure S1. Ripe fruit of 'Ninomiyahakuri'(left) and 'Eli No.2'(right) pears.

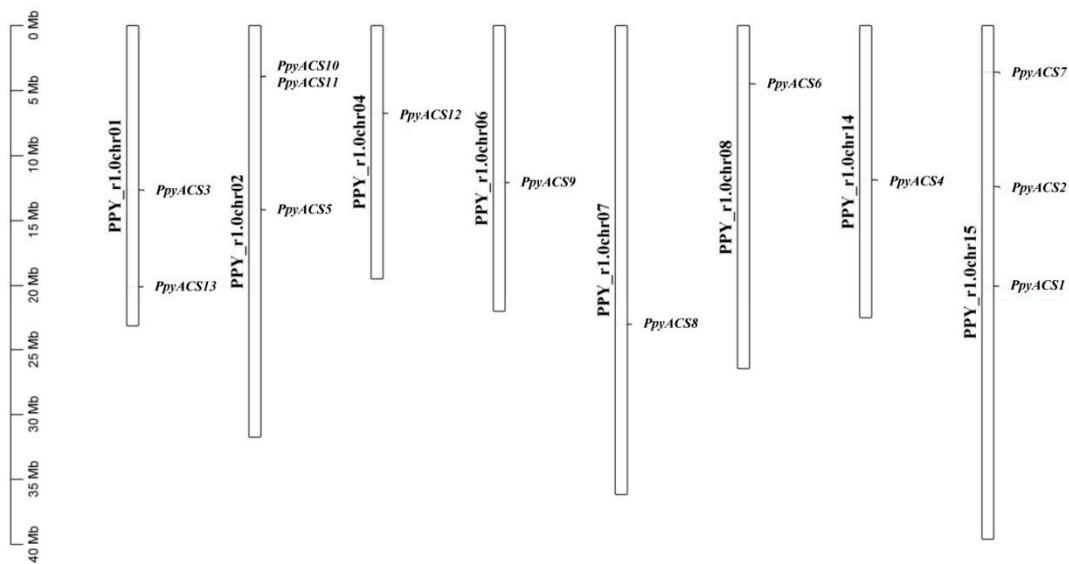

Figure S2. Distribution of ACS genes on the *Pyrus pyrifolia* chromosomes.

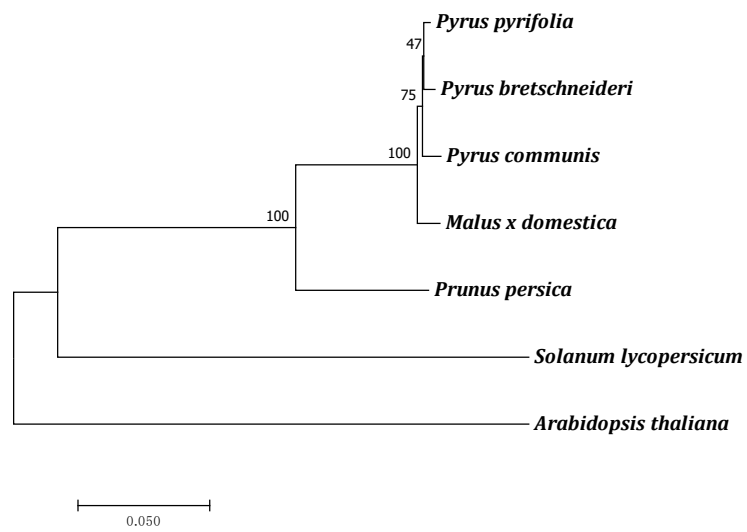

**Figure S3.** Species tree of five Rosaceae species and two reference species. The orthologs gene of different species were identified by using OrthoVenn2 and then aligned by using Clustal W (Table S5). The tree was constructed by using MEGA 7.0 software following the NJ (neighbor-joining) statistical method and bootstrap analysis was conducted with 1000 replicates .
