# Supplementary material
Source: MDPI journal article supplement (https://www.mdpi.com/2311-7524/7/10/401)
Supplement: s1 [file s1]

Archive with 2 entries (2 files):
- Supplementary Figure S1-3.pdf
- supplementaryTable S1-6.xlsx
