# Supplementary material
Source: MDPI journal article supplement (https://www.mdpi.com/2311-7524/7/10/401)
Supplement: s1 [file s1 › supplementaryTable S1-6.xlsx]

## Sheet: Table S1
	Table S1. ACS homologous genes identified in 5 Rosaceae species and 2 non-Rosaceae plant species.
	Common name	Species name	Chromosome number	Release version	Genome gene number	Identified ACS genes	Gene name prefix
	Sand pear	Pyrus pyrifolia	34	GDR, v1.0	44876	13	Ppy
	Chinese white pear	Pyrus bretschneideri	34	GDR, v1.1	42341	10	Pbr
	Pear	Pyrus communis	34	GDR,v2.0	43419	12	Pco
	Apple	Malus domestica	34	GDR, v1.1	45116	13	Mdo
	Peach	Prunus persica	16	GDR,v2.0	27864	8	Ppe
	Arabidopsis	Arabidopsis thaliana	10	Araport11	27655	11	At
	Tomato	Solanum lycopersicum	24	SL2.50	31200	14	Sl

## Sheet: S2
	Table S2. Primers used for qRT-PCR analysis
	Gene name	Forward (5'-3')	Reverse (5’- 3’)
	PpyACS1	CCAACTTGCCCGAGAGAACT	CACTTCGTGAGCGACTGTCC
	PpyACS2	CAGGCTTTCGAGTTGGTACT	GTATTTATGTAGTTTCCCGTG
	PpyACS3	GATCAAACGTTTGATGGCGA	GTTCAAACCTTCTGGATGATG
	PpyACS4	GATGGTGTTGTGGCACAAG	TTGGCTCCTTGTATTGAGC
	PpyACS5	GCAAACTTGTCCGAGGAAACA	CACTTGGTGAGTGACCGTCT
	PpyACS6	GTTGAATCCACCCTCGTTCCT	AACGGCCTGGTTCACGCTC
	PpyACS7	GAAGGAGAATCAAAGGAGAC	GCTGGTGAACAATTGCGGAG
	PpyACS8	AGATCAAACACTCGACGGAG	GCTCAAATCTTCTTGTTGAC
	PpyACS9	GATGGTGTTGTGGCGTACA	TGCTTCCTTGTCTTGTAGC
	PpyACS10	TCACTCCTCAAGCTTTGGAT	TGCACCTAAAGGGTTGGAAG
	PpyACS11	CAAGAAAAGGTGAACTGACC	GTATTCTTGTCAATGCAATCTC
	PpyACS12	AACCACCGGCATGAGAGTTA	GTTGGAGCGGTGTCTTTTCA
	PpyACS13	GAGGAGTTTGTGAGCATGGC	GCAGCCAACACACTCTCATT
	PP2A	CTCACGGTTTGTGGCAACTC	TATGACCACTTCCGCTTCCA

## Sheet: S3
Table S3. Detailed information of all ACS family genes identiﬁed in the seven species.
Gene name	Gene_ID	Chromosome	Len_pep	No_of_exons	Molecular weight	Theoretical pI	Type	Conserved Domain
PpyACS1	Ppy15g2510.1	Chr15:20022979..20024784+	473	4	53240.5	6.47	Type Ⅱ	PLN02450
PpyACS5	Ppy02g1684.1	Chr02:14156236..14158531+	473	4	53182.6	6.9	Type Ⅱ	PLN02450
PpyACS6	Ppy08g0607.1	Chr08:4476046..4478458-	488	5	55147.2	6.69	Type Ⅱ	PLN02450
PpyACS7	Ppy15g0540.1	Chr15:3580798..3589288-	502	5	56822.2	7.06	Type Ⅱ	PLN02450 superfamily
PpyACS3	Ppy01g0738.1	Chr01:12651750..12654529-	495	4	55540.4	7.96	TypeⅠ	PLN02450 superfamily
PpyACS8	Ppy07g1563.1	Chr07:23041756..23045681+	529	5	59567.4	8.53	TypeⅠ	PLN02450 superfamily
PpyACS9	Ppy06g0809.1	Chr06:12079561..12081861-	487	4	54668.8	7.56	TypeⅠ	PLN02450 superfamily
PpyACS4	Ppy14g0933.1	Chr14:11862299..11864545-	487	4	54856.8	6.64	TypeⅠ	PLN02450 superfamily
PpyACS2	Ppy15g1745.1	Chr15:12377889..12379594-	446	3	50096.6	5.65	Type Ⅲ	PLN02607
PpyACS10	Ppy02g0565.1	Chr02:3901240..3902919-	447	3	50310.9	5.63	Type Ⅲ	PLN02607
PpyACS11	Ppy02g0566.1	Chr02:3918274..3920013-	445	3	49844.5	5.84	Type Ⅲ	PLN02607
PpyACS12	Ppy04g0675.1	Chr04:6740597..6743142+	538	4	58891.7	8.76	Putative AAT	PLN02450 superfamily
PpyACS13	Ppy01g1669.1	Chr01:20075291..20079590-	611	6	67550.6	8.3	Putative AAT	PLN02450 superfamily
PbrACS1	rna40280	chr15:21882567..21884799+	473	4	53232.5	6.29	Type Ⅱ	PLN02450
PbrACS4	rna16674	chr2:10831383..10833679+	473	4	53152.6	6.9	Type Ⅱ	PLN02450
PbrACS5	rna38176	chr8:13997097..13999322+	460	4	52089.7	6.38	Type Ⅱ	PLN02450
PbrACS6	rna1570	chr15:4149930..4152657-	460	4	52413	7.03	Type Ⅱ	PLN02450
PbrACS2	rna42284	chr1:12198217..12201474+	495	4	55540.4	7.96	TypeⅠ	PLN02450 superfamily
PbrACS7	rna20744	chr7:9790887..9794608+	495	4	55542.4	8.42	TypeⅠ	PLN02450 superfamily
PbrACS3	rna45195	chr6:8617002..8619470-	487	4	54753.8	7.57	TypeⅠ	PLN02450 superfamily
PbrACS8	rna6539	chr15:13062737..13065095-	446	3	50096.6	5.65	Type Ⅲ	PLN02607
PbrACS9	rna27863	chr4:15613459..15616216-	538	4	58904.7	8.85	Putative AAT	PLN02450 superfamily
PbrACS10	rna29126	chr1:3938998..3941787-	506	4	55963.5	7.46	Putative AAT	PLN02450 superfamily
PcoACS1b	mRNA:pycom15g26520	Chr15:21449266..21451638+	521	4	59125.6	7.6	Type Ⅱ	PLN02450
PcoACS1a	mRNA:pycom02g15530	Chr2:12349883..12352194+	473	4	53196.6	6.9	Type Ⅱ	PLN02450
PcoACS6	mRNA:pycom08g06340	Chr8:4902450..4904693-	460	4	52118.7	6.17	Type Ⅱ	PLN02450
PcoACS4	mRNA:pycom01g09960	Chr1:10765634..10768378-	479	4	53833.7	8.8	TypeⅠ	PLN02450 superfamily
PcoACS7	mRNA:pycom07g12870	Chr7:14253036..14256933+	523	6	58805.2	8.5	TypeⅠ	PLN02450 superfamily
PcoACS8	mRNA:pycom06g08630	Chr6:13858496..13860128-	259	4	28430.2	5.11	TypeⅠ	PLN02450 superfamily
PcoACS5	mRNA:pycom14g10630	Chr14:13372639..13374891-	487	4	54829.8	6.47	TypeⅠ	PLN02450 superfamily
PcoACS2	mRNA:pycom15g18050	Chr15:12798762..12800473-	448	3	50302.7	5.71	Type Ⅲ	PLN02607
PcoACS9	mRNA:pycom02g05820	Chr2:3915056..3916731-	505	3	49817.3	5.75	Type Ⅲ	PLN02607
PcoACS3	mRNA:pycom02g05830	Chr2:3930966..3932704-	445	3	57423.3	5.43	Type Ⅲ	PLN02607
PcoACS10	mRNA:pycom04g06730	Chr4:6956819..6959365+	538	4	58813.6	8.67	Putative AAT	PLN02450 superfamily
PcoACS11	mRNA:pycom01g19800	Chr1:18358349..18360865-	594	4	65786.6	8.85	Putative AAT	PLN02450 superfamily
MdoACS1	mRNA:MD15G1302200	Chr15: 29180039..29182443+	473	4	53280.6	6.58	Type Ⅱ	PLN02450
MdoACS2	mRNA:MD02G1190900	Chr02: 17669165..17672536+	481	5	54070.9	7.99	Type Ⅱ	PLN02450
MdoACS8	mRNA:MD08G1076500	Chr08: 6263508..6265920-	498	5	56453.8	6.44	Type Ⅱ	PLN02450
MdoACS9	mRNA:MD15G1145400	Chr15: 10777101..10779539-	460	4	52287.8	6.73	Type Ⅱ	PLN02450
MdoACS10	mRNA:MD15G1063800	Chr15: 4392473..4394835-	462	5	52568.2	6.87	Type Ⅱ	PLN02450 superfamily
MdoACS11	mRNA:MD01G1070400	Chr01:17470583..17472989-	561	4	63058.4	8.12	TypeⅠ	PLN02450 superfamily
MdoACS12	mRNA:MD06G1090600	Chr06: 21948037..21951007-	487	4	54647.9	8.41	TypeⅠ	PLN02450 superfamily
MdoACS13	mRNA:MD14G1111500	Chr14:17953030..17955957-	487	4	54876.8	6.47	TypeⅠ	PLN02450 superfamily
MdoACS3	mRNA:MD15G1203500	Chr15: 16180415..16183020-	446	3	49998.6	5.65	Type Ⅲ	PLN02607
MdoACS4	mRNA:MD02G1073900	Chr02: 5950346..5952144-	445	3	49806.4	5.84	Type Ⅲ	PLN02607
MdoACS5	mRNA:MD02G1073800	Chr02: 5933931..5935947-	447	3	50267.8	5.46	Type Ⅲ	PLN02607
MdoACS7	mRNA:MD04G1076200	Chr04: 10276648..10279425+	540	4	59164.1	8.76	Putative AAT	PLN02450 superfamily
MdoACS6	mRNA:MD01G1186400	Chr01: 28510462..28514771-	506	4	56086.6	7.46	Putative AAT	PLN02450 superfamily
PpeACS4	Prupe.6G214400.1_v2.0.a1	Chr06: 22236784..22239254-	483	4	52913.6	8.66	Type Ⅱ	PLN02450
PpeACS6	Prupe.1G417800.1_v2.0.a1	Chr01: 36230131..36234648-	460	4	55020	6.54	Type Ⅱ	PLN02450
PpeACS5	Prupe.5G106200.1_v2.0.a1	Chr05: 11240965..11244068-	484	4	54114	6.2	TypeⅠ	PLN02450 superfamily
PpeACS1	Prupe.2G176900.1_v2.0.a1	Chr02: 22202265..22205502-	493	4	54955.8	8.23	TypeⅠ	PLN02450 superfamily
PpeACS2	Prupe.7G213800.1_v2.0.a1	Chr07: 19423813..19425546+	422	3	50087	6.39	Type Ⅲ	PLN02607
PpeACS3	Prupe.7G213900.1_v2.0.a1	Chr07: 19431444..19433260+	345	3	49310.7	5.53	Type Ⅲ	PLN02607
PpeACS7	Prupe.2G283100.1_v2.0.a1	Chr02: 28105099..28107897-	509	4	56453.8	7.94	Putative AAT	PLN02450 superfamily
PpeACS8	Prupe.5G083500.1_v2.0.a1	Chr05: 9622904..9626221-	541	4	59119	8.38	Putative AAT	PLN02450 superfamily
SlACS1A	mRNA:Solyc08g081550.2.1	Chr08: 64574577..64571928 -	472	5	53484.5	7.15	TypeⅠ	PLN02450 superfamily
SlACS1B	mRNA:Solyc08g081540.2.1	Chr08: 64567933..64570466 +	483	4	54563.5	6.18	TypeⅠ	PLN02450 superfamily
SlACS2	mRNA:Solyc01g095080.2.1	Chr01: 86456196..86453267 -	485	4	54662.6	7.92	TypeⅠ	PLN02450 superfamily
SlACS3	mRNA:Solyc02g091990.2.1	Chr02: 53210555..53208754 -	469	4	53094.5	8.23	Type Ⅱ	PLN02450
SlACS4	mRNA:Solyc05g050010.2.1	Chr05: 59888702..59891616 +	476	3	53519.2	5.56	TypeⅠ	PLN02450 superfamily
SlACS5	mRNA:Solyc04g077410.2.1	Chr04: 62317036..62314473 -	471	4	53486.4	9.1	Type Ⅲ	PLN02450 superfamily
SlACS6	mRNA:Solyc08g008100.2.1	Chr08: 2582839..2580112 -	483	4	54563.5	6.18	TypeⅠ	PLN02450 superfamily
SlACS7	mRNA:Solyc02g063540.1.1	Chr02: 35649566..35648516 -	467	3	32053.8	5.9	Type Ⅱ	PLN02450
SlACS8	mRNA:Solyc03g043890.2.1	Chr03: 7572274..7574653 +	471	4	53107.6	7.55	Type Ⅱ	PLN02450
SlACS9	mRNA:Solyc07g026900.1.1	Chr07: 32131840..32133366 +	441	3	49966.9	5.72	Type Ⅲ	PLN02607
SlACS10	mRNA:Solyc12g008740.1.1	Chr12: 2101472..2099000 -	434	3	49171	7.93	Type Ⅲ	PLN02607
SlACS11	mRNA:Solyc03g007070.2.1	Chr03: 1631548..1637772 +	535	4	58707.2	6.16	Putative AAT	PLN02450 superfamily
SlACS12	mRNA:Solyc08g079750.2.1	Chr08: 63239384..63235804 -	548	4	60216.5	8.83	Putative AAT	PLN02450 superfamily
SlACS13	mRNA:Solyc12g056180.1.1	Chr12: 62145270..62149204 +	473	4	53544.5	5.39	TypeⅠ	PLN02450 superfamily
AtACS1	AT3G61510.1	Chr3: 22763495..22766010-	488	4	55003	7.18	TypeⅠ	PLN02376 superfamily
AtACS2	AT1G01480.1	Chr1: 175706..178406 +	496	4	55531.5	7.2	TypeⅠ	PLN02376
AtACS4	AT2G22810.1	Chr2: 9717602..9719594 -	474	4	53795.4	8.5	Type Ⅱ	PLN02450
AtACS5	AT5G65800.1	Chr5: 26330746..26332812 -	470	3	53312.9	7.55	Type Ⅱ	PLN02450
AtACS6	AT4G11280.1	Chr4: 6863979..6866116 +	495	4	55524.4	6.23	TypeⅠ	PLN02450 superfamily
AtACS7	AT4G26200.1	Chr4: 13275200..13277188 +	447	3	50665.5	5.94	Type Ⅲ	PLN02607
AtACS8	AT4G37770.1	Chr4: 17752079..17754157 +	469	4	53370.9	8	Type Ⅱ	PLN02450
AtACS9	AT3G49700.1	Chr3: 18434449..18436141 -	470	4	53169.8	6.73	Type Ⅱ	PLN02450
AtACS10	AT1G62960.1	Chr1: 23318187..23320427 -	557	4	61015.9	6.69	Putative AAT	PLN02450 superfamily
AtACS11	AT4G08040.1	Chr4: 4886962..4889224 +	460	4	51798.9	6.34	Type Ⅱ	PLN02450
AtACS12	AT5G51690.1	Chr5: 20997413..21001054 -	495	4	55213.8	7.03	Putative AAT	PLN02450 superfamily

## Sheet: S4
		Table S4. Sequences and lengths of motifs among PpyACS proteins.
	Motif	Conserved amino acid sequences	Length
	1	LTAGATSANELLMFCLADPGDAFLVPTPYYPGFDRDLKWRTGVZIVPIHC	50
	2	CWMDLRRLLRSNTFEAEMELWDKIVHEVKLNISPGSSCHCSEPGWFRVCF	50
	3	RVHIVYSLSKDLGLPGFRVGIVYSYNDKVVAAARKMSSFGLVSSQTQHLL	50
	4	HGZDSPYFLGWKAYDENPYHEVSNPNGVIQMGLAENQLSFDLIEEWLAEN	50
	5	NLRVKGVLITNPSNPLGTTLTRDTLESLLDFVTEKNIHLVSDEIYSGTVF	50
	6	CTSNGVSGFREIALFQDYHGLPEFRKAMASFMAQIRGNRVTFDPDRIV	48
	7	MLSDKEFTENYIATNRKRLKKRYDMFVEGLKKAGISCLKSN	41
	8	SSNNFKITETALEAAYEEAZK	21
	9	ANMSEETLEVALQRIKAFVEQ	21
	10	SSPSFISIAEIJEDR	15
	11	FEREGDSVMSPCMMSPHSPIPQSPLVRAT	29
	12	KEQAQPKKSKKRWQSNLRLSF	21
	13	SQPSLLLSKIATSDT	15
	14	YYNVPEVNGRSQSSQLSHSRGRSLTKWVFRLSFDDRCPIPG	41
	15	TGMRLIVPLQGVVQGRGGLILGSLIPCALFYCLQLYLKRRR	41
	16	TJVPQQTGLSKSRWLKNKW	19

## Sheet: S5
			Table S5. ACS orthologs genes identiﬁed in the seven species.
orthologs gene pairs	Pyrus pyrifolia	Pyrus bretschneideri	Pyrus communis	Malus x domestica	Prunus persica	Solanum lycopersicum	Arabidopsis thaliana
1	Ppy01g1669.1	rna29126	pycom01g19800	MD01G1186400	Prupe.2G283100.1	Solyc03g007070.2.1	AT5G51690.1
2	Ppy02g1684.1	rna16674	pycom02g15530	MD02G1190900	Prupe.6G214400.1	Solyc02g091990.2.1	AT3G49700.1
3	Ppy04g0675.1	rna27863	pycom04g06730	MD04G1076200	Prupe.5G083500.1	Solyc08g079750.2.1	AT1G62960.1

## Sheet: S6
	Table S6. Different expression of ACS genes in sand pear fruit ripening. FPKM（Fragments Per Kilobase of transcript per Million fragments mapped）
Gene name	Gene_ID	Ninomiyahakuri-1	Ninomiyahakuri-2	Ninomiyahakuri-3	E Li No.2 -1	E Li No.2 -2	E Li No.2 -3
PpyACS1	Ppy15g2510.1	0	0	285.739	0	0	0
PpyACS2	Ppy15g1745.1	0.03	0	47.8143	0.03	1.54	34.21
PpyACS3	Ppy01g0738.1	0	0	91.8573	0	0.74	1.89279
PpyACS4	Ppy14g0933.1			0			0
PpyACS5	Ppy02g1684.1			0			0
PpyACS6	Ppy08g0607.1			0			0
PpyACS7	Ppy15g0540.1			0			0
PpyACS8	Ppy07g1563.1	0.06	0.07	0	0.01	0.09	0
PpyACS9	Ppy06g0809.1	0	0	1.28015	0	0	0.565709
PpyACS10	Ppy02g0565.1			0			0
PpyACS11	Ppy02g0566.1			0			0
PpyACS12	Ppy04g0675.1	7.41	4	2.466	14.62	4.09	3.43166
PpyACS13	Ppy01g1669.1	9.2	9.64	5.64	5.57	5.8	6.0688
